1 **Moderate consistency in smooth newt behaviour**

2

3 Petr Chajma<sup>1,\*</sup>, Jiří Vojar<sup>1</sup>, Oldřich Kopecký<sup>2</sup>

4

5 1–Department of Ecology, Faculty of Environmental Sciences, Czech University of Life  
6 Sciences Prague, Kamýcká 129, Praha – Suchdol, 165 00, Czech Republic

7 2–Department of Zoology and Fish Farming, Faculty of Agrobiological Sciences, Food and Natural  
8 Resources, Czech University of Life Sciences Prague, Kamýcká 129, Praha – Suchdol,  
9 165 00, Czech Republic

10 \* Corresponding author; e-mail: [chajmap@fzp.czu.cz](mailto:chajmap@fzp.czu.cz)

11

12 Behavioural consistency (i.e., personality) is a novel field of research in amphibians.  
13 Current published studies often address only one or two aspects of personality and  
14 therefore cannot assess more complex relationships and behavioural syndromes. This is  
15 the first study focusing on all relevant behavioural traits and their relationships in  
16 urodele amphibians. Based on the three trials of the experiment, we examined the  
17 consistency of activity (time spent moving), boldness (latency of the first movement and  
18 time spent escaping) and exploration (number of visited segments of testing arena) of 43  
19 smooth newts (*Lissotriton vulgaris*). Individual consistency, calculated through the  
20 intraclass correlation coefficient (ICC), was low in newt activity (ICC = 0.192) and  
21 moderate in boldness (0.491) and exploration (0.412). Activity was moderately  
22 consistent for each trial (0.425), indicating a possible habituation that was supported by  
23 a decrease of mean activity throughout the trials. Correlation of the behavioural traits  
24 studied suggests the presence of a behavioural syndrome, which potentially shaped the

25 traits together. Our findings suggest the need for a complex approach to the study of  
26 amphibian personality and the need for standardized methodology, which would solve  
27 the current difficulties in comparing published results.

## 28 **Introduction**

29 Behavioural consistency (i.e., personality) is a well-known phenomenon studied in  
30 many taxa<sup>1–3</sup> and recently studied in amphibians<sup>4–10</sup>. Consistency in the expression of  
31 behavioural traits over time and in different situations, as well as the correlation of those  
32 traits, i.e., behavioural syndrome<sup>3</sup>, is often linked to survival in predator-prey  
33 situations<sup>11,12</sup> (but see Carlson & Langkilde<sup>4</sup>), reproductive success<sup>13,14</sup>, disease risk<sup>9</sup>  
34 and dispersal tendencies<sup>6,8,15,16</sup>. Therefore, animal personality plays an important part in  
35 individual life histories and should be inspected and carefully considered when dealing  
36 with most aspects of animal ecology.

37 Amphibian personality research, however, is limited and includes mostly studies  
38 performed on anurans, especially their larvae (see Table 1). In contrast, there are  
39 considerably fewer studies for urodeles<sup>10,17</sup> and none for caecilians. Existing amphibian  
40 studies most commonly address the consistency of activity, boldness and exploration  
41 (Table 1). Most of these studies (none of which consider urodeles), however, address  
42 only one or two of these behavioural traits (axis of personality) and usually cover some  
43 specific problem, not personality *per se*. There are also differences in approaches to  
44 behavioural consistency because some studies cover differences across time<sup>5–8</sup>, while  
45 others consider differences across situations<sup>9,10,17,18</sup>.

46 Therefore, the aim of our study was to measure the consistency of main behavioural  
47 traits—activity, exploration and boldness—in one experiment to examine the main  
48 types of behavioural responses and to focus only on temporal consistency while

49 reducing other factors. Furthermore, we wanted to assess the correlations between these  
50 behaviour types (i.e., the existence of behavioural syndrome).

## 51 **Results**

### 52 *Activity*

53 The sex of newts ( $X^2 = 0.31$ ,  $P = 0.58$ ) and the time of day ( $X^2 = 0.49$ ,  $P = 0.48$ ) had no  
54 significant effect on their activity. There were, however, significant differences in mean  
55 activity between each trial ( $X^2 = 76.57$ ,  $P < 10^{-6}$ ). The initial mean activity of 309.9  
56 seconds decreased by 32 % in the second trial and by 20 % in the third trial. Although  
57 the activity had a low ICC ( $ICC = 0.192$ ,  $CI = [0.089, 0.361]$ ), the activity was  
58 significantly repeatable for each newt. The activity among the newts was also repeatable  
59 during each trial of the experiment ( $ICC = 0.425$ ,  $CI = [0.298, 0.477]$ ).

60 When the activity was divided into walking and swimming, walking was the preferred  
61 type of locomotion with the ratio of 1.8:1 with respect to swimming ( $X^2 = 816.09$ ,  $P <$   
62  $10^{-6}$ ). As with the total activity, sex and time of day had no influence on the amount of  
63 walking (sex:  $X^2 = 0.35$ ,  $P = 0.55$ ; day time:  $X^2 = 0.97$ ,  $P = 0.33$ ) or swimming (sex:  $X^2$   
64  $= 0.66$ ,  $P = 0.42$ ; day time:  $X^2 = 2.63$ ,  $P = 0.10$ ). Both the amount of walking ( $X^2 = 9.68$ ,  
65  $P < 0.01$ ) and swimming ( $X^2 = 19.92$ ,  $P < 10^{-4}$ ) differed significantly between the trials  
66 of the experiment, but their ratio remained unchanged, with sex and time of day having  
67 no effect (sex:  $X^2 = 0.43$ ,  $P = 0.51$ ; day time:  $X^2 = 0.86$ ,  $P = 0.35$ ; trial:  $X^2 = 0.87$ ,  $P =$   
68  $0.65$ ). Albeit significant, the repeatability of walking was relatively low for each newt  
69 ( $ICC = 0.273$ ,  $CI = [0.073, 0.474]$ ) and non-significant for the trial ( $ICC = 0.066$ ,  $CI =$   
70  $[0, 0.247]$ ). Swimming was more repeatable than walking and was significant for each  
71 individual ( $ICC = 0.434$ ,  $CI = [0.229, 0.635]$ ) but not each trial ( $ICC = 0.116$ ,  $CI = [0,$   
72  $0.338]$ ). The walking to swimming ratio was moderately consistent for each individual

73 (Kendall's  $W = 0.597$ ,  $P = 0.002$ ) but, although significant, was practically inconsistent  
74 for each trial (Kendall's  $W = 0.107$ ,  $P = 0.015$ ).

75 **Figure 1. Number of newts according to their prevalent type of movement**

76 Walkers – walking to swimming time ratio  $>2$ , walkers/swimmers –ratio 0.5–2, swimmers –ratio  $<0.5$ .

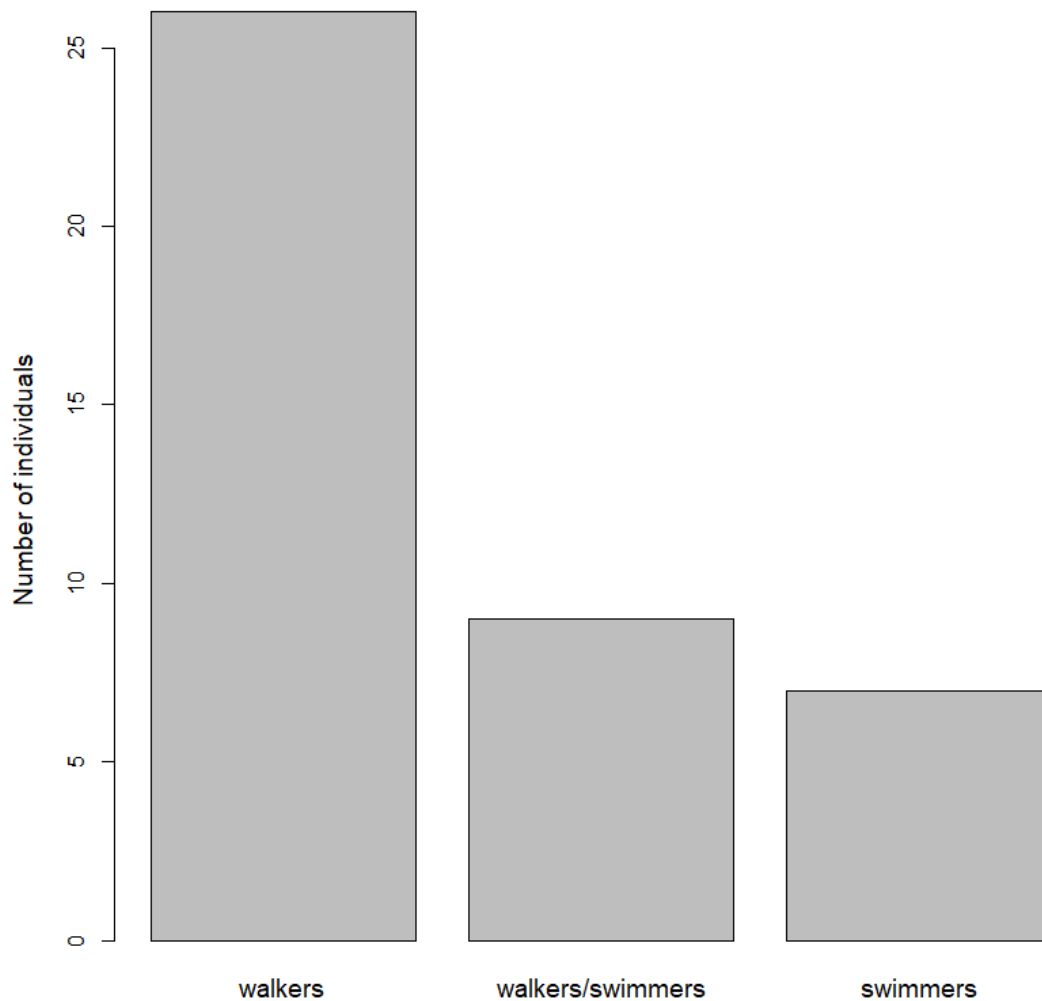

77

78 *Exploration*

79 The sex of the newt ( $X^2 = 0.50$ ,  $P = 0.48$ ) and the time of day ( $X^2 = 0.17$ ,  $P = 0.68$ ) did  
80 not affect the number of squares explored by newts. As with the first activity, there was  
81 a significant difference between each trial of the experiment ( $X^2 = 9.64$ ,  $P = 0.01$ ). The

82 initial mean of 27.8 explored squares decreased by 2.5 % in the second and by 18 % in  
83 the third trial. Exploration was significantly repeatable for each newt with a moderate  
84 ICC ( $ICC = 0.412$ ,  $CI = [0.225, 0.593]$ ). In contrast to activity, there was no  
85 repeatability for the exploration in each trial ( $ICC = 0.053$ ,  $CI = [0, 0.215]$ ).

#### 86 *Boldness*

87 Boldness was measured as the latency to move and the time spent with an escape  
88 response. Latency to move was not dependent on any tested variables (sex:  $X^2 = 0.03$ ,  $P$   
89  $= 0.86$ ; day time:  $X^2 = 0.24$ ,  $P = 0.63$ ; trial:  $X^2 = 0.61$ ,  $P = 0.74$ ). Time spent with an  
90 escape response was also independent of sex ( $X^2 = 0.04$ ,  $P = 0.85$ ) and time of day ( $X^2 =$   
91  $0.93$ ,  $P = 0.33$ ) and marginally independent of the trial ( $X^2 = 5.64$ ,  $P = 0.06$ ). The initial  
92 mean time spent with the escape response of 226.9 seconds decreased by 5.5 % in the  
93 second trial and then rose by 30 % in the third trial. The repeatability of latency and  
94 time spent escaping was similar for each trial of the experiment, but not for individual  
95 newts. Latency was not repeatable for both newt ( $ICC = 0.128$ ,  $CI = [0, 0.339]$ ) and trial  
96 ( $ICC = 0$ ,  $CI = [0, 0.065]$ ). Time spent escaping was, on the other hand, moderately  
97 repeatable for each newt ( $ICC = 0.491$ ,  $CI = [0.312, 0.659]$ ) and not repeatable for each  
98 trial ( $ICC = 0.024$ ,  $CI = [0, 0.111]$ ).

#### 99 *Correlated behaviour*

100 The similarity in mean activity, exploration and time spent escaping of individuals was  
101 relatively high (*Kendall's W* = 0.694,  $P = 0.0001$ ). Pairwise correlations showed a  
102 strong positive relationship between activity and time spent escaping ( $r = 0.734$ ,  $P < 10^{-6}$ )  
103 and a moderate correlation between activity and exploration ( $r = 0.539$ ,  $P = 0.0002$ )  
104 and between time spent escaping and exploration ( $r = 0.405$ ,  $P = 0.0078$ ).

#### 105 **Discussion**

106 Observed behavioural responses of studied newts were moderately consistent for  
107 swimming activity, walking to swimming ratio, exploration and escape response.  
108 Repeatability of activity as a whole was lower because of the less repeatable walking  
109 activity that was more prevalent than swimming. The consistency of walking to  
110 swimming ratio, i.e., the choice of locomotion type, however, suggests at least some  
111 degree of individuality. Boldness was consistent only if measured as thigmotaxis (i.e.,  
112 time spent with escape response), not as latency of the first movement. Studied  
113 behaviour responses also did not differ between sexes and were unaffected by the time  
114 of day that experiment started.

115 We expected the results of our study to be similar to *Lissotriton boscai*<sup>10</sup> which is, out  
116 of studied urodeles, the closest relative to our model species. In the study of *Lissotriton*  
117 *boscai*, however, there was a significant difference in individual activity between sexes,  
118 with higher consistency in males ( $r = 0.77$ ,  $P < 0.001$ ) and no consistency in females ( $r$   
119  $= 0.05$ ,  $P > 0.84$ ). On the other hand, the consistency was measured between different  
120 situations—in the presence of none and conspecifics' odour, and thus the different  
121 outcomes may be due to the different experimental design. Additionally, there was no  
122 distinction between walking and swimming activity, nor any mention of their ratio.

123 In terms of anuran research, the overall activity of *Lithobates catesbeianus* was not  
124 found to repeatable in time for Carlson & Langkilde<sup>5</sup> ( $ICC = 0.12$ ) but was slightly  
125 repeatable in different environments for Smith & Doupnik<sup>18</sup> ( $r_1 = 0.355$ ,  $r_2 = 0.151$ ,  $r_3 =$   
126  $0.219$ ). Wilson & Krause<sup>7</sup> reported consistent activity in time for both tadpoles ( $r = 0.8$ ,  
127  $P < 0.0001$ ) and froglets ( $r = 0.91$ ,  $P < 0.0001$ ) of *Pelophylax ridibundus*. There are  
128 either no tests of consistency of activity in other studies (Table 1), or the results are  
129 incomparable due to the use of different statistical methods.

130 Multiple behaviour patterns were observed for exploration as well. Most of the newts  
131 started the trial with a quick escape response and then commenced with the exploration  
132 of the outer ring of the arena, rarely visiting the inner parts. A smaller group was  
133 startled at first and then explored the inner parts of the arena, eventually reaching the  
134 outer ring. Compared to *Rana temporaria*, for which Brodin et al.<sup>8</sup> tested the  
135 repeatability between life stages ( $r = 0.25$ ,  $P > 0.05$ ), our consistency of exploration was  
136 higher but was less than in *Lithobates catesbeianus*<sup>5</sup> ( $ICC = 0.68$ ,  $CI = [0.46, 0.93]$ ).  
137 The higher consistency in bullfrogs was, however, accompanied by short (24 h)  
138 intervals between trials. Furthermore, both studies differed in the definition of  
139 exploratory behaviour; the first study used a four cm buffer around the trajectory of the  
140 individual and the second counted the sides of the squares crossed by individuals  
141 including those already visited.

142 The repeatability of boldness was present only for the escape response ( $ICC = 0.491$ ,  $CI$   
143  $= [0.312, 0.659]$ ), which is a similar measure to that of Carlson & Langkilde<sup>5</sup>, who  
144 counted the number of square sides on the inner portion of the test arena crossed by an  
145 individual and which is also a measure of thigmotaxis. Their results ( $ICC = 0.25$ ,  $CI =$   
146  $[0-0.57]$ ) are less precise, and the estimated coefficient is lower even though measured  
147 with the shorter 24 h breaks between trials. The accuracy of latency of the first  
148 movement, as the measure of boldness, was impaired for our study by the inability to  
149 consistently raise the glass dome in the centre of the arena at the start of the experiment.

150 We suspect this to be issue in other studies as well, deeming this method impractical.  
151 This problem can be mitigated by changing the first movement to a movement longer  
152 than one body length<sup>7</sup>, but in our opinion, it is better to choose a different option, e.g.,  
153 shelter use, escape initiation distance or thigmotaxis.

154 Moderate correlation of shelter use in the presence and absence of predator cues in  
155 urodeles was reported by Sih et al.<sup>17</sup> for *Ambystoma barbouri* ( $r = 0.5$ ,  $P < 0.001$ ) and  
156 *A. texanum* ( $r = 0.64$ ,  $P = 0.02$ ), whose shelter use was also consistent between day and  
157 night (without predator cues:  $r = 0.8$ ,  $P < 0.001$ ; with predator cues:  $r = 0.617$ ,  $P <$   
158  $0.001$ ). Brodin et al.<sup>8</sup> reported weak consistency of time, needed for the escape from the  
159 starting zone for *R. temporaria* tadpoles ( $r = 0.34$ ,  $P = 0.012$ ), which prevailed even  
160 after metamorphosis ( $r = 0.25$ ,  $P > 0.05$ ). Maes et al.<sup>6</sup> ( $r = 0.24$ ,  $P > 0.05$ ) and Carlson  
161 & Langkilde<sup>5</sup> ( $ICC = 0.25$ ,  $CI = [0, 0.57]$ ) reported similar magnitudes of correlation for  
162 latency of the first movement and thigmotaxis, while Wilson & Krause<sup>7</sup> found a much  
163 stronger correlation in tadpoles ( $r = 0.85$ ,  $P < 0.0001$ ) and froglets ( $r = 0.96$ ,  $P <$   
164  $0.0001$ ) between latency of the first movement and escape initiation distance (tadpoles  
165 EID:  $r = 0.56$ ,  $P = 0.0003$ ; froglets EID:  $r = 0.42$ ,  $P = 0.04$ ).

166 Activity and exploration significantly decreased with each trial of the experiment, which  
167 suggests that habituation may have taken place (but see Carlson & Langkilde<sup>5</sup>). Except  
168 for activity, no behavioural trait was repeatable for each trial of the experiment. This  
169 could mean that the magnitude of habituation varied individually, i.e., individuality was  
170 stronger than habituation (see Fig. 2). For activity, its repeatability for each trial of the  
171 experiment was, unexpectedly, followed by low repeatability of both walking and  
172 swimming. Other than habituation, another less likely explanation is that the decrease in  
173 the expression of behaviour traits could have been caused by insufficient time between  
174 the trials of the experiment, allowing newts to remember the last trial. Unfortunately, it  
175 was not possible to allow more time between the trials because we feared that newts  
176 might switch to the terrestrial phase and change their behaviour. Nevertheless, most  
177 amphibian personality studies had a less than four-day gap between repeated



178 measurements (but see<sup>6,8</sup>). Habituation recovery time is unknown for the studied  
179 species. For the common toad, however, Ewert & Kehl<sup>26</sup> stated that 6–24 h is long  
180 enough for recovery from habituation to an artificial rectangular-shaped prey dummy.

181

## 182 **Figure 2. Individuality vs. habituation**

183 A – activity between trials, B – exploration between trials, C – escape response between trials.

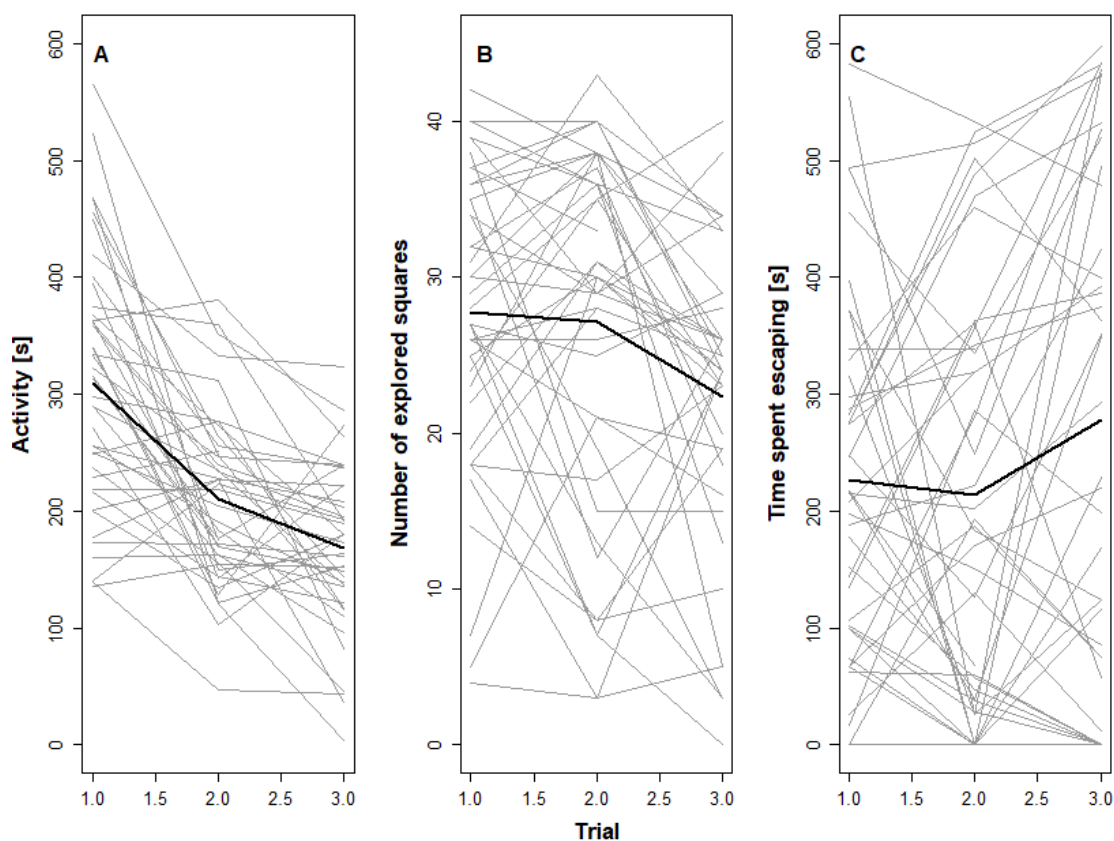

184

185 Behavioural syndromes are referred to as suites of correlated behaviours<sup>3</sup>. In  
186 amphibians, activity has been found to correlate with exploration<sup>6,9</sup> and boldness<sup>6,7</sup>.

187 Boldness has also been found to correlate with exploration<sup>6</sup> (but see Brodin et al.<sup>8</sup>).

188 Maes et al.<sup>6</sup> divided the behaviours, using a PCA analysis, into two axes, the first  
189 containing activity and exploration, while the second contained only latency of the first

190 movement. Contrary to their findings, our results show a correlation of activity,

191 exploration and time spent escaping, potentially creating only one axis (*Kendall's W* =  
192 0.694,  $P = 0.0001$ ). More active individuals tended to explore more and were less bold,  
193 spending more time escaping. This behaviour might also be a result of a common  
194 selective pressure, favouring individuals with a greater insight on the situation in their  
195 home pond. The predation rate in the pond was, however, low (pers. obs.), and thus the  
196 pressure might be of a reproductive nature. Increase in locomotion activity has been  
197 found to benefit in mate searching<sup>27</sup>, but we are not aware of any studies researching the  
198 other two axes. Because of the absence of behavioural differences between sexes, this  
199 pressure might be beneficial for both males and females or at least not harmful for  
200 either. Whatever the cause, correlated behaviours, i.e., behaviours that are part of a  
201 syndrome should not be studied in isolation because they develop as a group<sup>3</sup>. To study  
202 behaviour syndrome completely, it would also be beneficial to test if the correlations  
203 persist in different situations and ecological contexts.

204 In conclusion, amphibian personality research is very sparse, and findings differ  
205 considerably in both approach and results. Behavioural consistency is often studied on a  
206 small scale in relatively specific conditions, and behavioural correlations are sometimes  
207 neglected. We believe that a more complex approach (measuring more types of  
208 behaviour) and similar methodologies (i.e., definition of behaviour types, correlation in  
209 time and different situations, standard time gap between repeated measurements,  
210 number of repeated measurements, duration of experiment and sampling effort, and test  
211 arena shape and size) is due. Our study design is easily reproducible with a  
212 straightforward statistical evaluation and is applicable to most amphibian species while  
213 introducing a novel view on urodele locomotion activity, which makes it a viable  
214 contribution to the studied phenomenon.

## 215 **Methods**

### 216 *Experimental design*

217 The experiment was carried out at the specialized laboratory of the Czech University of  
218 Life Sciences in Prague. For a model organism, we chose the urodele that was most  
219 abundant locally, the smooth newt (*Lissotriton vulgaris*). At the start of the reproductive  
220 season in the beginning of May 2015, 21 males and 21 females were captured by nets in  
221 a single pond in the village Stará Lysá in the Central Bohemia region. The newts were  
222 housed separately in plastic containers of dimensions  $18 \times 12 \times 14$  cm that were filled  
223 with aged tap water, and the newts were fed *Daphnia* and Chironomidae larvae *ad*  
224 *libitum*. The air temperature in the laboratory was constant and set to 17°C. Sufficient  
225 light intensity in a diurnal cycle was provided by the translucent roof of the laboratory.  
226 The experiment itself was conducted between 13<sup>th</sup> and 27<sup>th</sup> May in two experimental  
227 arenas made of non-transparent round green water barrels with bottom diameters of 80  
228 cm. Using a non-toxic waterproof marker, a square grid of 7 cm segments was drawn at  
229 the bottom to better assess the position of each newt. The arena was filled with 5 cm of  
230 cold tap water (10.8–11.2°C), and after each recording, the water was changed, and the  
231 arena was thoroughly cleaned with a clean sponge and water pressure and then left to  
232 dry to eliminate any potential chemical cues that remained from the previous individual  
233 tested.  
234 Each trial of the experiment was 12 minutes long. Behaviour was recorded at 30 frames  
235 per second with a full HD camera, positioned approximately 150 cm above the water  
236 level. Newts were separately inserted under the transparent glass dome (10 cm  
237 diameter) into the centre of the arena and left to calm down for the first two minutes.  
238 Then, the dome was carefully removed in a motion perpendicular to the ground, and the

239 recording was initiated. To measure the temporal repeatability of the behaviour, each  
240 individual was recorded three times with a six day gap between each recording, which  
241 was the longest gap possible before the newts started to shift to the terrestrial phase of  
242 the season. Unfortunately, three videos were lost due to technical difficulties in the last  
243 trial of the experiment, so the total number of analysed videos was 123.

244 Three types of behaviour (personality traits) were tracked: activity, exploration and  
245 boldness. Activity was measured as the amount of time(s) during which the individual  
246 moved. Furthermore, the movement activity was divided to walking and swimming to  
247 distinguish the role of each in total activity and the consistency of each as well as to  
248 determine the consistency of their ratio. Typical walkers tended to move slowly and  
249 cautiously, almost never swimming (walking to swimming time ratio  $> 2$ ). Swimmers  
250 often swam the entire time (ratio  $< 0.5$ ), and walkers/swimmers spent time walking in  
251 one part and swimming in other parts of the same trial (ratio 0.5–2; see Fig. 1).  
252 Exploration was recorded as the number of grid blocks that an individual entered.  
253 Boldness was measured as the latency of the first movement(s) (the most common but  
254 imprecise measure of boldness, see Discussion) and as the time(s) spent staying outside  
255 the edge of the arena. Staying in its vicinity (thigmotaxis) can be interpreted as an  
256 escape response and therefore can also be a valuable measure of shyness<sup>5,19,20</sup>.

257 Behaviour was scored manually by the same person using the software Observer XT v.  
258 10<sup>21</sup>. The study was carried out in accordance with permit SZ-092744/2012KUSK/3  
259 issued by the Regional Office of the Central Bohemian Region of the Czech Republic.

#### 260 *Data analysis*

261 The effect of sex and time of day on the newts' activity, exploration and boldness was  
262 tested with separate linear mixed effects models (LMM) fitted by restricted maximum

263 likelihood (REML) with the random intercepts of individual (1–42) and the trial number  
264 (1–3) and was evaluated using Type II Wald Chi-squared tests. Unlike Carlson &  
265 Langkilde<sup>5</sup>, we considered trial number a random intercept because the estimation of  
266 slope from just three measurements would have been too imprecise. The same model  
267 was also run separately for walking and swimming activity and for their ratio.  
268 The repeatability of personality traits was calculated using the intraclass correlation  
269 coefficient (ICC), computed from the variance components of described models.  
270 Confidence intervals (CI) for the ICC were estimated by parametric bootstrapping with  
271 1000 iterations (for details see Nakagawa & Schielzeth<sup>22</sup>). The existence of behavioural  
272 syndromes was tested using Kendall’s coefficient of concordance, rather than ICC,  
273 because the interest lays in the ranks of responses, rather than their absolute value. The  
274 presence of zero values for walking and swimming made the use of ICC on their ratio  
275 impossible. Therefore, a constant (0.1) was added to each numerator and denominator,  
276 and its repeatability was also calculated using the rank-based coefficient of  
277 concordance. Pairwise similarities were analysed using Pearson’s correlation  
278 coefficient. All statistical analyses were performed in R 3.3.1<sup>23</sup> using *lme4*<sup>24</sup> and *car*<sup>25</sup>  
279 packages at the level of significance  $\alpha = 0.05$ .

#### 280 *Data Availability*

281 The datasets generated during and/or analysed during the current study are available in  
282 the Open Science Framework repository, <https://osf.io/nbfk6/>.

283 **Acknowledgements.** The study was carried out in accordance with permit SZ-  
284 092744/2012KUSK/3 issued by the Regional Office of the Central Bohemian Region of  
285 the Czech Republic with the support of Vladimír Vaněk (the mayor of Stará Lysá) and

286 grants no. 20164234 and 20174216, provided by the Internal Grant Agency of the  
287 Faculty of Environmental Sciences, Czech University of Life Sciences Prague.

288 **Author contributions.** O. Kopecký captured and cared for newts and together with P.  
289 Chajma participated on the execution of the experiment. P. Chajma analysed the data,  
290 prepared all figures and tables and together with J. Vojar wrote the main manuscript.  
291 All authors reviewed the manuscript.

292 **Competing interests.** The author(s) declare no competing interests.

293

## 294   **References**

- 295   1.    Gosling, S. D. From mice to men: what can we learn about personality from  
296       animal research? *Psychol. Bull.* **127**, 45–86 (2001).
- 297   2.    Garamszegi, L. Z., Marko, G. & Herczeg, G. A meta-analysis of correlated  
298       behaviors with implications for behavioral syndromes: relationships between  
299       particular behavioral traits. *Behav. Ecol.* **24**, 1068–1080 (2013).
- 300   3.    Sih, A., Bell, A., Johnson, J. & Ziemba, R. Behavioral syndromes: an integrative  
301       overview. *Q. Rev. Biol.* **79**, 241–277 (2004).
- 302   4.    Carlson, B. E. & Langkilde, T. No evidence of selection by predators on tadpole  
303       boldness. *Behaviour* **151**, 23–45 (2014).
- 304   5.    Carlson, B. E. & Langkilde, T. Personality Traits Are Expressed in Bullfrog  
305       Tadpoles during Open-Field Trials. *J. Herpetol.* **47**, 378–383 (2013).
- 306   6.    Maes, J., Van Damme, R. & Matthysen, E. Individual and among-population  
307       variation in dispersal-related traits in Natterjack toads. *Behav. Ecol.* **24**, 521–531  
308       (2012).
- 309   7.    Wilson, A. D. M. & Krause, J. Personality and metamorphosis: Is behavioral  
310       variation consistent across ontogenetic niche shifts? *Behav. Ecol.* **23**, 1316–1323  
311       (2012).
- 312   8.    Brodin, T., Lind, M., Wiberg, M. & Johansson, F. Personality trait differences  
313       between mainland and island populations in the common frog (*Rana temporaria*).  
314       *Behav. Ecol. Sociobiol.* **67**, 135–143 (2013).
- 315   9.    Koprivnikar, J., Gibson, C. H. & Redfern, J. C. Infectious personalities:  
316       behavioural syndromes and disease risk in larval amphibians. *Proc. R. Soc. B*  
317       *Biol. Sci.* **279**, 1544–1550 (2011).
- 318   10.   Aragón, P. The response to the social environment reveals sex-dependent  
319       behavioural syndromes in the Bosca’s newt (*Lissotriton boscai*). *J. Ethol.* **29**, 79–  
320       83 (2011).
- 321   11.   Dingemanse, N. J. & de Goede, P. The relation between dominance and  
322       exploratory behavior is context-dependent in wild great tits. *Behav. Ecol.* **15**,  
323       1023–1030 (2004).
- 324   12.   Carlson, B. E. & Langkilde, T. Predation risk in tadpole populations shapes  
325       behavioural responses of prey but not strength of trait-mediated indirect  
326       interactions. *Oikos* **123**, 1519–1527 (2014).
- 327   13.   Cole, E. F. & Quinn, J. L. Shy birds play it safe: personality in captivity predicts  
328       risk responsiveness during reproduction in the wild. *Biol. Lett.* **10**, 1–5 (2014).
- 329   14.   Dingemanse, N. & Réale, D. Natural selection and animal personality. *Behaviour*  
330       **142**, 1159–1184 (2005).
- 331   15.   Cote, J., Clobert, J., Brodin, T., Fogarty, S. & Sih, a. Personality-dependent  
332       dispersal: characterization, ontogeny and consequences for spatially structured  
333       populations. *Philos. Trans. R. Soc. Lond. B. Biol. Sci.* **365**, 4065–4076 (2010).
- 334   16.   Cote, J., Fogarty, S., Tymen, B., Sih, A. & Brodin, T. Personality-dependent

- 335 dispersal cancelled under predation risk. *Proc. R. Soc. B Biol. Sci.* **280**, 1–9  
336 (2013).
- 337 17. Sih, A., Kats, L. B. & Maurer, E. F. Behavioural correlations across situations  
338 and the evolution of antipredator behaviour in a sunfish-salamander system.  
339 *Anim. Behav.* **65**, 29–44 (2003).
- 340 18. Smith, G. R. & Doupnik, B. L. Habitat use and activity level of large American  
341 bullfrog tadpoles: Choices and repeatability. *Amphib. Reptil.* **26**, 549–552 (2005).
- 342 19. Harris, A. P., D'Eath, R. B. & Healy, S. D. Environmental enrichment enhances  
343 spatial cognition in rats by reducing thigmotaxis (wall hugging) during testing.  
344 *Anim. Behav.* **77**, 1459–1464 (2009).
- 345 20. Burns, J. G. The Validity of Three Tests of Temperament in Guppies (*Poecilia*  
346 *reticulata*). *J. Comp. Psychol.* **122**, 344–356 (2008).
- 347 21. Noldus. *The Observer XT. Reference manual version 10.* (2010).
- 348 22. Nakagawa, S. & Schielzeth, H. Repeatability for Gaussian and non-Gaussian  
349 data : a practical guide for biologists. *Biol. Rev.* **85**, 935–956 (2010).
- 350 23. R Core Team. R: A Language and Environment for Statistical Computing.  
351 (2016).
- 352 24. Bates, D., Maechler, M., Bolker, B. & Walker, S. Fitting Linear Mixed-Effects  
353 Models Using lme4. *J. Stat. Softw.* **67**, 1–48 (2015).
- 354 25. Fox, J. & Weisberg, S. *An R Companion to Applied Regression.* (Sage, 2011).
- 355 26. Ewert, J. P. & Kehl, W. Configurational prey-selection by individual experience  
356 in the toad *Bufo bufo*. *J. Comp. Physiol.* **126**, 105–114 (1978).
- 357 27. Martin E, Joly, P, Bovet, P. Diel pattern of activity in the alpine newt (*Triturus*  
358 *Alpestris*, amphibia-urodela) during the aquatic phase. *Biol. Behav.* **14**, 116–131  
359 (1989).
- 360
- 361



362 **Table 1. Summary of amphibian personality studies**

| Study                            | Species                                          | Stage                 | Personality traits examined |          |             |
|----------------------------------|--------------------------------------------------|-----------------------|-----------------------------|----------|-------------|
|                                  |                                                  |                       | Activity                    | Boldness | Exploration |
| Urodeles                         |                                                  |                       |                             |          |             |
| Aragón <sup>10</sup>             | <i>Lissotriton boscai</i>                        | adults                | yes                         | no       | No          |
| Sih et al. <sup>3</sup>          | <i>Ambystoma barbouri</i> ,<br><i>A. texanum</i> | larvae                | no                          | yes      | No          |
| Anurans                          |                                                  |                       |                             |          |             |
| Brodin et al. <sup>8</sup>       | <i>Rana temporaria</i>                           | tadpoles,<br>froglets | no                          | yes      | Yes         |
| Carlson & Langkilde <sup>5</sup> | <i>Lithobates catesbeianus</i>                   | tadpoles              | yes                         | yes      | Yes         |
| Koprivnikar et al. <sup>9</sup>  | <i>Lithobates sylvaticus</i>                     | tadpoles              | yes                         | no       | Yes         |
| Maes et al. <sup>6</sup>         | <i>Epidalea calamita</i>                         | froglets              | yes                         | yes      | Yes         |
| Smith & Doupnik <sup>18</sup>    | <i>Lithobates catesbeianus</i>                   | tadpoles              | yes                         | no       | No          |
| Wilson & Krause <sup>7</sup>     | <i>Pelophylax ridibundus</i>                     | tadpoles,<br>froglets | yes                         | yes      | Yes         |

363 Stage – stage of individual development (tadpoles, larvae – pre-metamorphosis; froglets – post-  
364 metamorphosis; adults – post-metamorphosis, capable of reproduction)

365 Yes/no – the study did (not) measure activity/boldness/exploration

366
